# Supplementary material
Source: publisher site journal article supplement (https://www.dovepress.com/article/569506)
Supplement: Supplementary file 1 [file 569506%20Revised%20Supplementary%20Material.pdf]

# Supplementary Figure

**Supplementary Figure 1.** Bubble plot of KEGG enrichment analysis for differentially expressed genes between advanced and mild fibrosis groups.

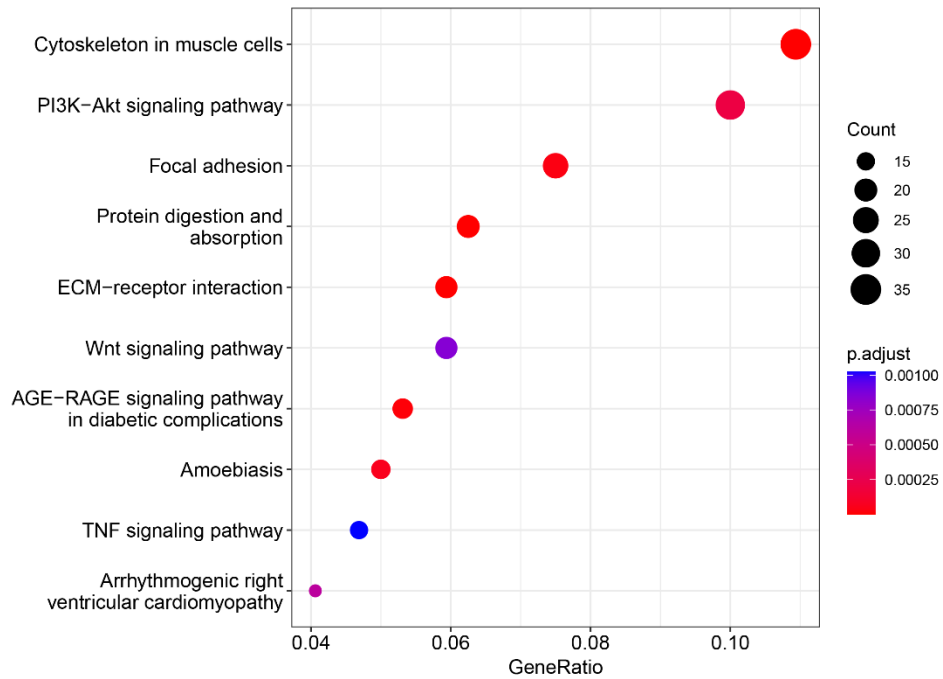

**Supplementary Figure 2.** Validation of the expression and diagnostic performance of VWF, NFASC in training and validation datasets

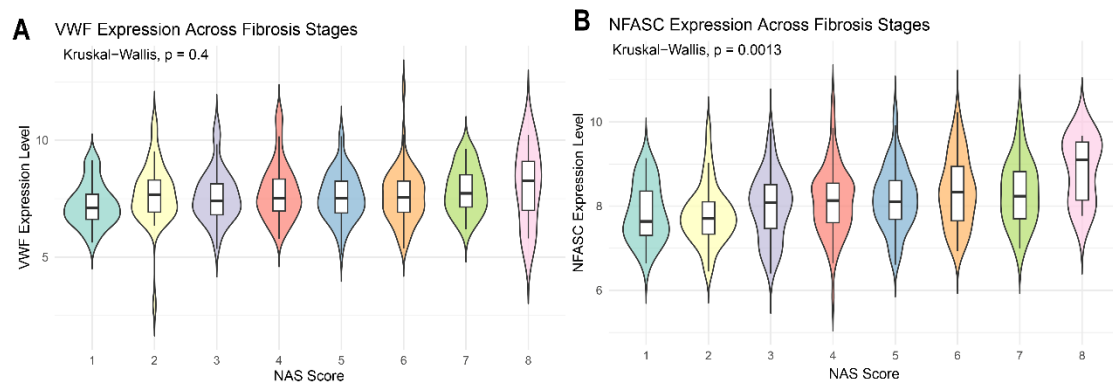

(A-B) Expression differences of VWF and NFASC across NAFLD Activity Score (NAS) grades in the training cohort.

**Supplementary Figure 3.** Single-Cell Sequencing Analysis of NAFLD Patients with advanced fibrosis.

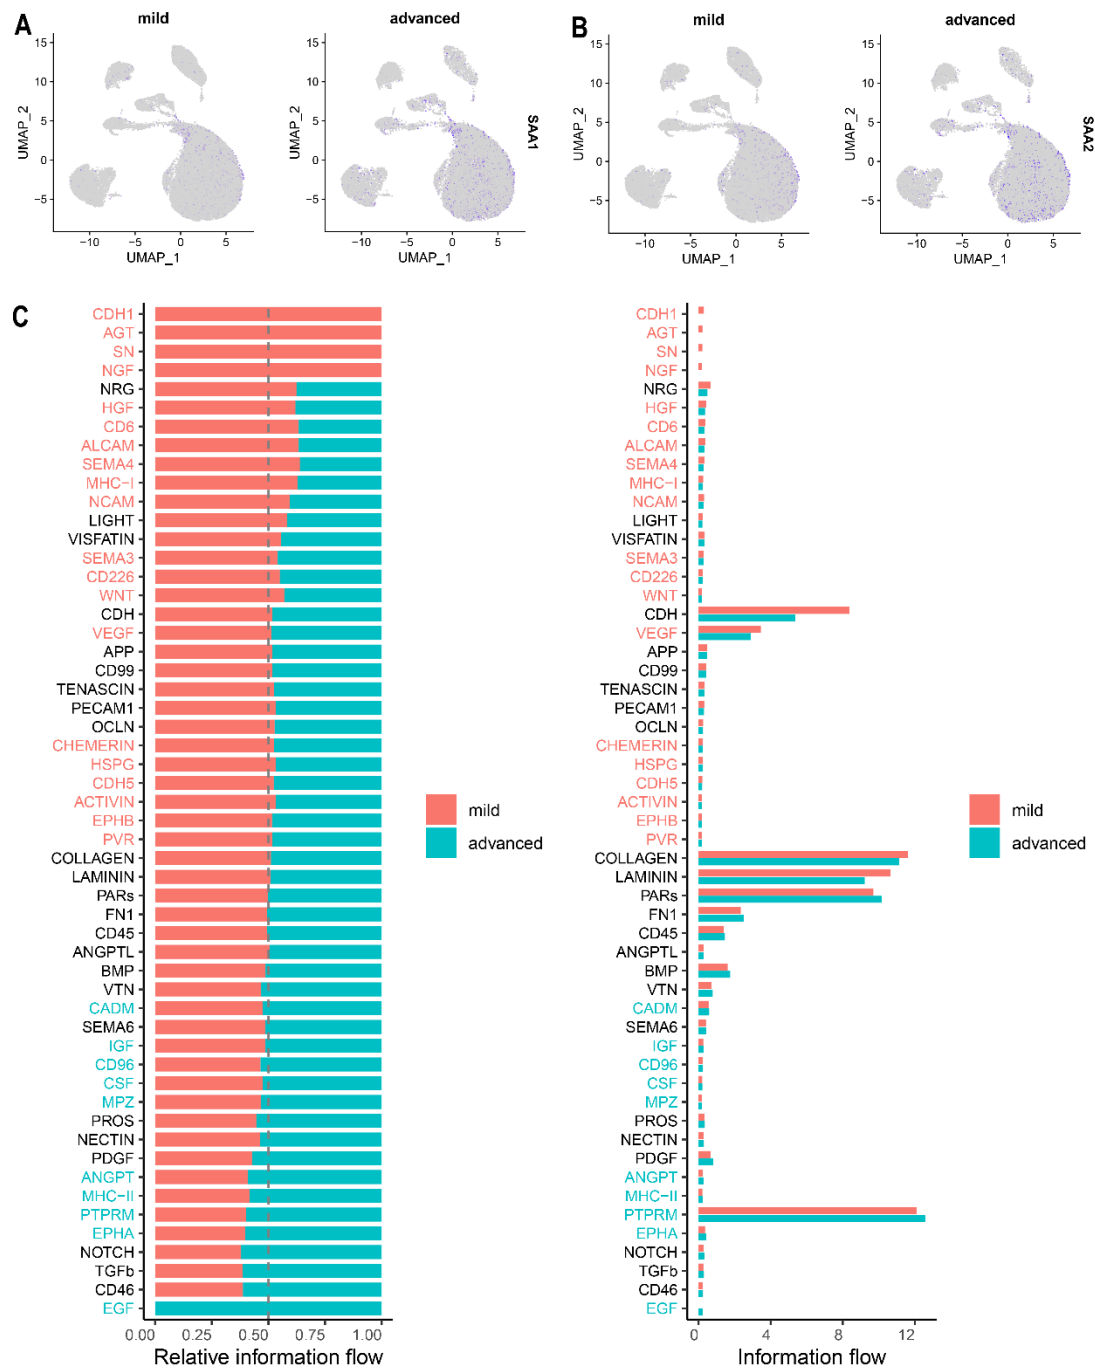

(A-B) The SAA1 and SAA2 expressions in advanced fibrosis group and mild fibrosis group. (C) The differentiated pathways between advanced fibrosis and mild fibrosis in intercellular communication analysis.

**Supplementary Table 1:** The detailed information of datasets in our study.

| Dataset                                           | Species      | Tissue Source | mild fibrosis | advanced fibrosis |
|---------------------------------------------------|--------------|---------------|---------------|-------------------|
| Single-cell sequencing data                       |              |               |               |                   |
| GSE202379                                         | Homo sapiens | Liver         | 24            | 16                |
| Transcriptome sequencing data in test group       |              |               |               |                   |
| GSE130970                                         | Homo sapiens | Liver         | 62            | 16                |
| GSE135251                                         | Homo sapiens | Liver         | 138           | 68                |
| GSE162694                                         | Homo sapiens | Liver         | 92            | 20                |
| Transcriptome sequencing data in validation group |              |               |               |                   |
| GSE193066                                         | Homo sapiens | Liver         | 80            | 26                |
| Proteomics data                                   |              |               |               |                   |
| PMID: 37037945                                    | Homo sapiens | Blood         | 112           | 79                |
